# Supplementary material for: High-resolution monthly precipitation and temperature time series from 2006 to 2100
Source: PubMed Central journal article supplement (PMC7378208; doi:10.1038/s41597-020-00587-y), 2020-07-23
Supplement: 41597_2020_587_MOESM1_ESM.pdf [file 41597_2020_587_MOESM1_ESM.pdf]

## Supplementary Information

### High resolution monthly precipitation and temperature timeseries for the period 2006-2100

Dirk Nikolaus Karger<sup>1</sup>, Dirk Schmatz<sup>1</sup>, Gabriel Dettling<sup>1</sup>, Niklaus E. Zimmermann<sup>1</sup>

<sup>1</sup>. Swiss Federal Research Institute for Forest, Snow and Landscape WSL, Zürcherstrasse 111, 8903 Birmensdorf, Switzerland.

corresponding author(s): Dirk Nikolaus Karger ([dirk.karger@wsl.ch](mailto:dirk.karger@wsl.ch))

### Table of Contents

|                                                                                                                                                                                                                                                                                                              |   |
|--------------------------------------------------------------------------------------------------------------------------------------------------------------------------------------------------------------------------------------------------------------------------------------------------------------|---|
| Figure S1. Mean absolute error (MAE), root mean square error (RSME), and spearman correlation (COR) of the downscaled mean monthly daily maximum temperatures (tmax) at 0.043° resolution (orange) and the original input from the four GCMs (blue) for a comparison with observations from GHCN.....        | 2 |
| Figure S2. Mean absolute error (MAE), root mean square error (RSME), and spearman correlation (COR) of the downscaled mean monthly daily minimum temperatures (tmin) at 0.043° resolution (orange) and the original input from the four GCMs (blue) for a comparison with observations from GHCN.....        | 3 |
| Figure S3. Mean absolute error (MAE), root mean square error (RSME), and spearman correlation (COR) of the downscaled precipitation (ps) at 0.043° resolution (orange) and the original input from the four GCMs (blue) for a comparison of mean monthly precipitation sums with observations from GHCN..... | 4 |

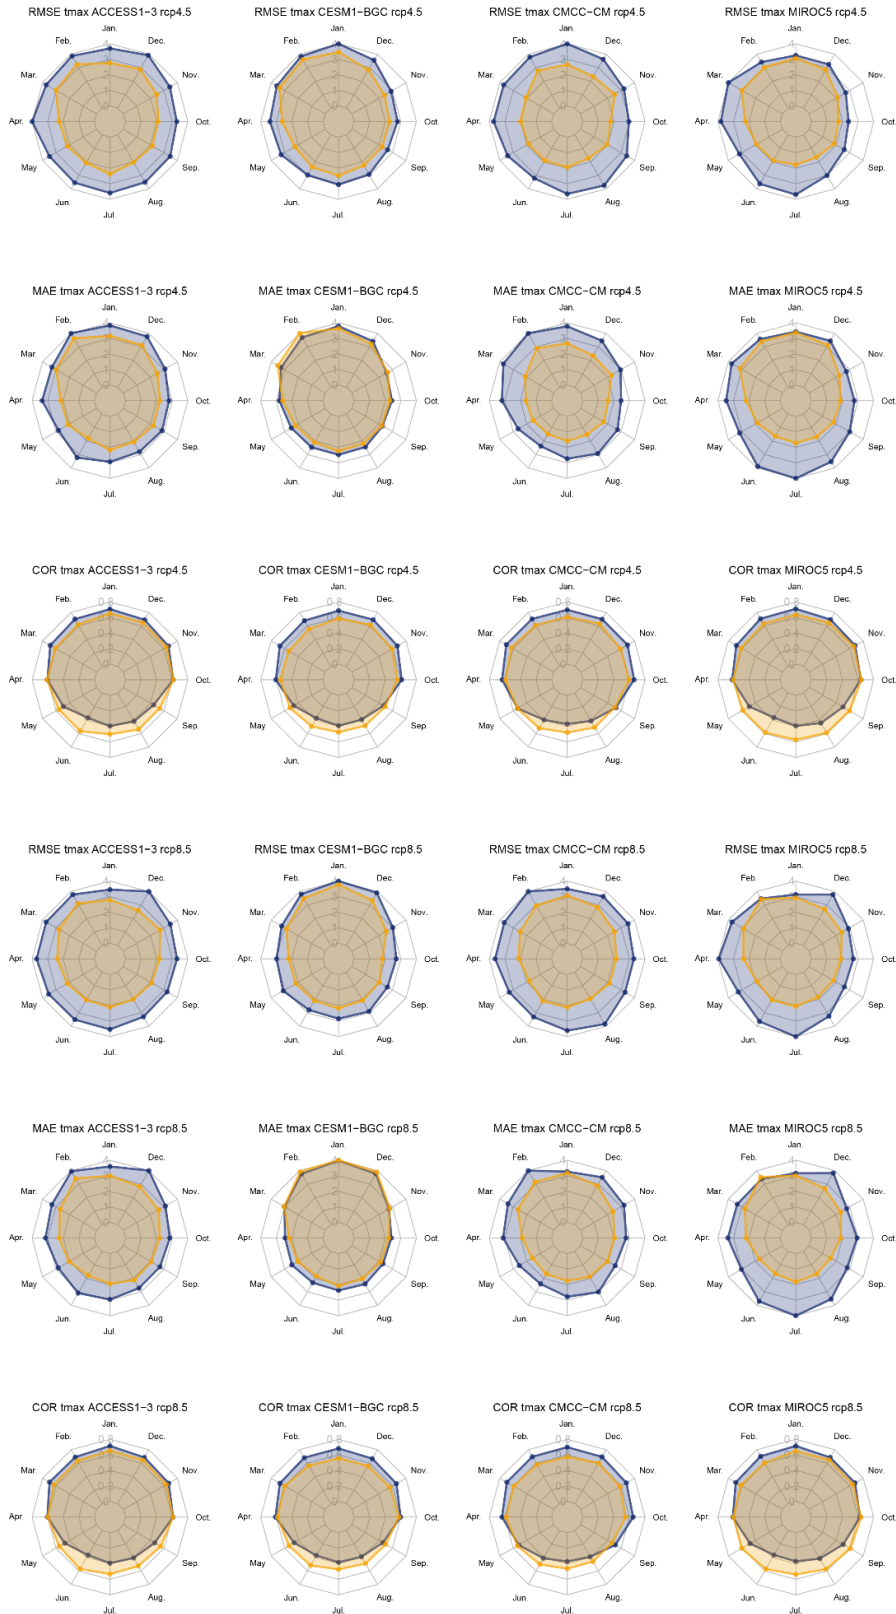

Figure S1. Mean absolute error (MAE), root mean square error (RSME), and spearman correlation (COR) of the downscaled mean monthly daily maximum temperatures (tmax) at  $0.043^\circ$  resolution (orange) and the original input from the four GCMs (blue) for a comparison with observations from GHCN.

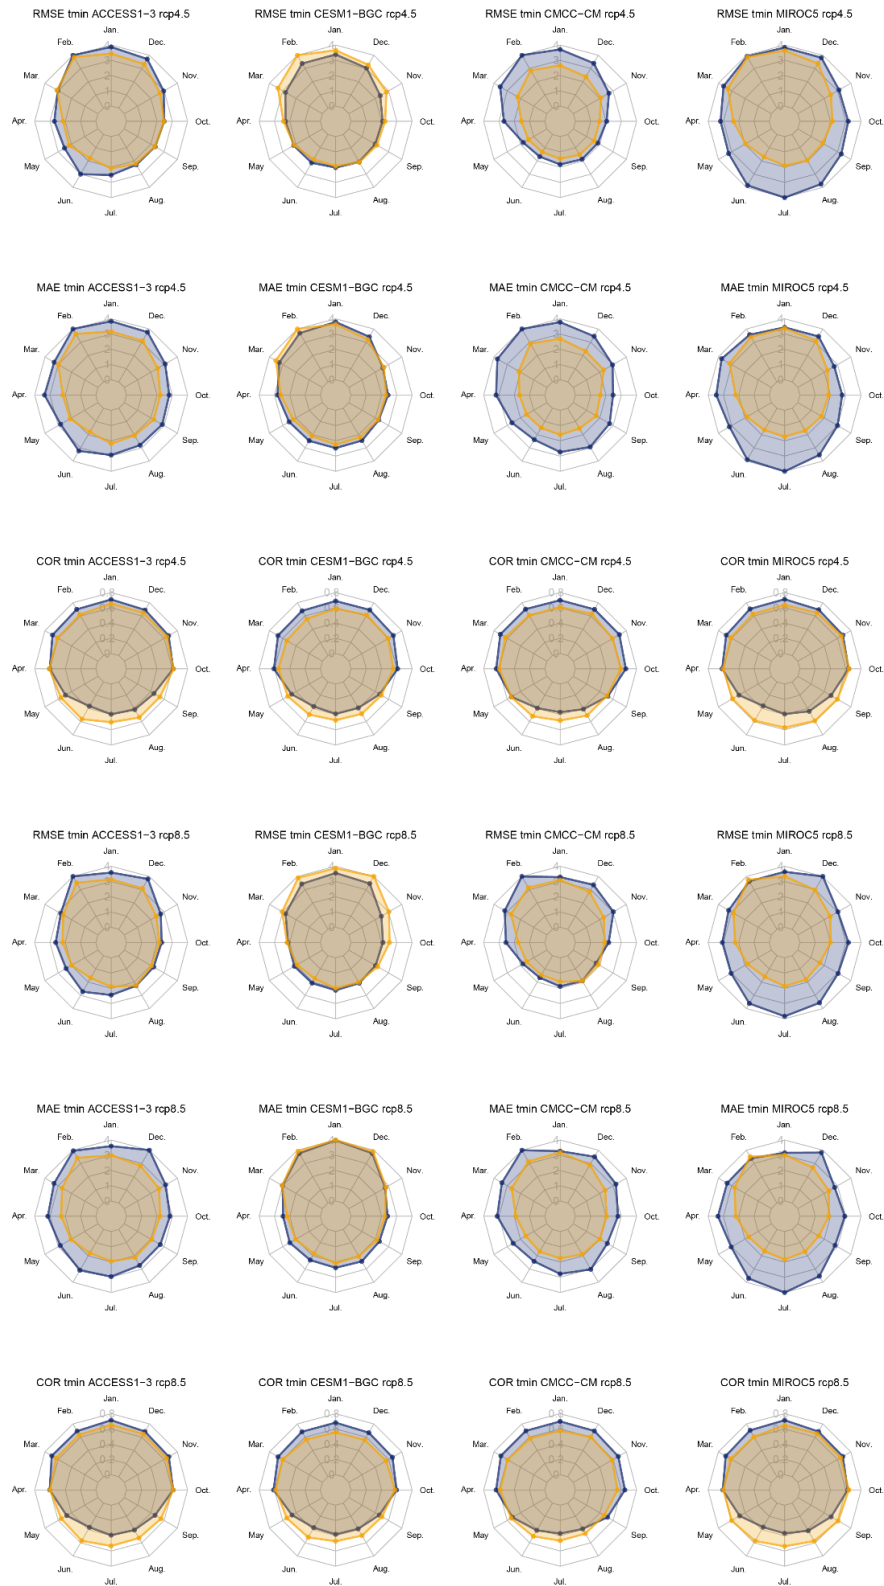

Figure S2. Mean absolute error (MAE), root mean square error (RSME), and spearman correlation (COR) of the downscaled mean monthly daily minimum temperatures (tmin) at  $0.043^\circ$  resolution (orange) and the original input from the four GCMs (blue) for a comparison with observations from GHCN.

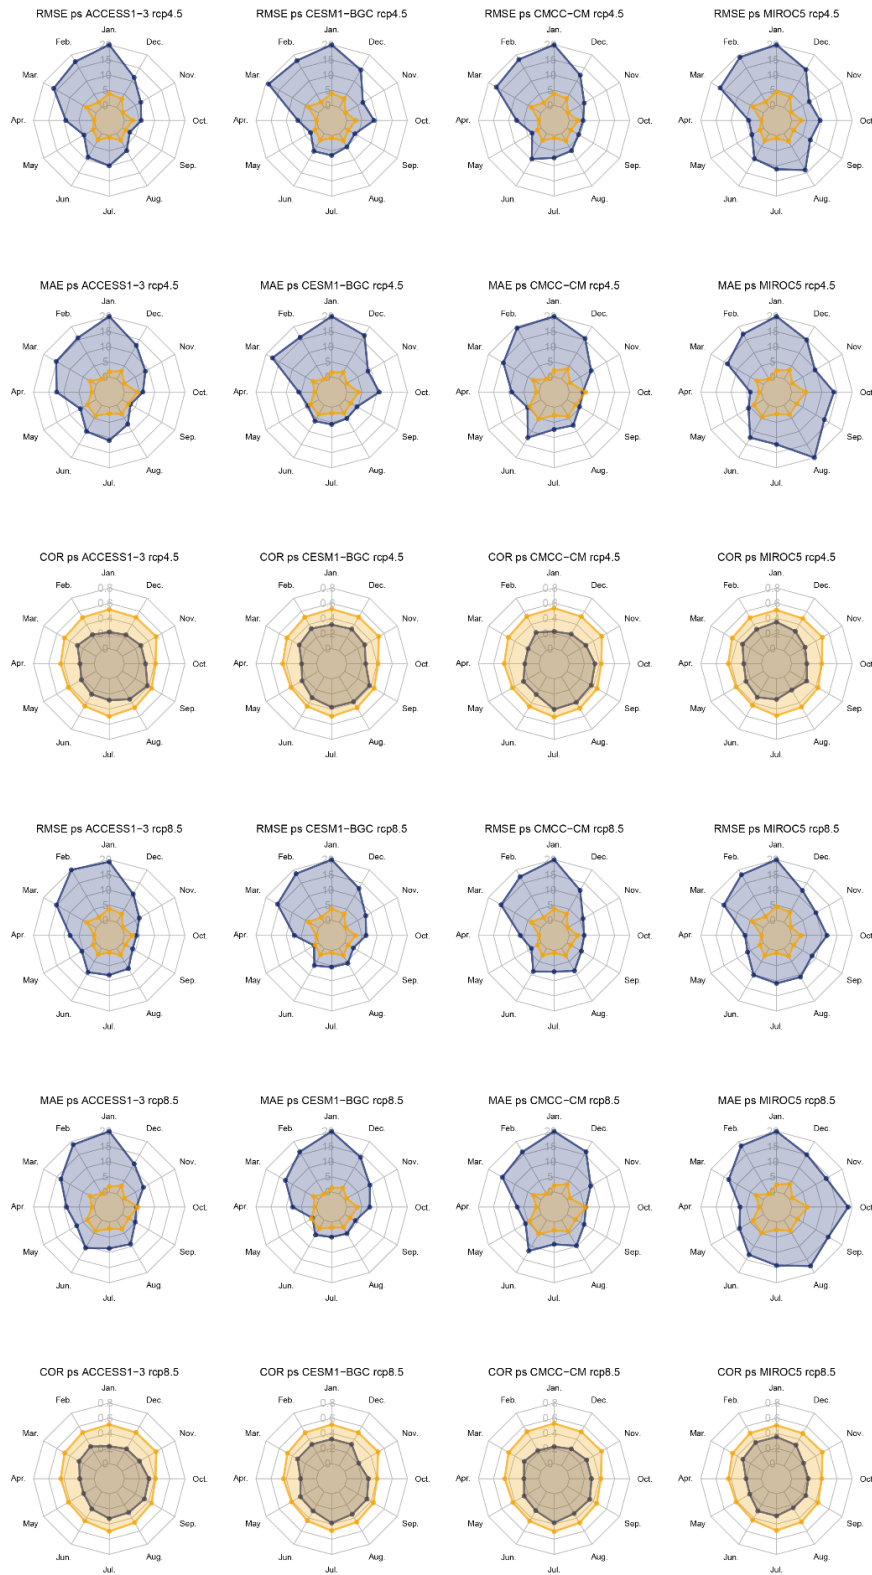

Figure S3. Mean absolute error (MAE), root mean square error (RSME), and spearman correlation (COR) of the downscaled precipitation (ps) at  $0.043^\circ$  resolution (orange) and the original input from the four GCMs (blue) for a comparison of mean monthly precipitation sums with observations from GHCN.
